# Supplementary material
Source: PubMed Central journal article supplement (PMC3110614)
Supplement: NIHMS287959-supplement-2.pdf [file NIHMS287959-supplement-2.pdf]

**CD3 zeta exon alignments**

|                      | <b>Exon 1(-)2</b>                                              | <b>Exon 3</b>             | <b>Exon 4</b>                | <b>Exon 5</b> | <b>Exon 6</b>       | <b>Exon 7</b> | <b>Exon 8</b>         |
|----------------------|----------------------------------------------------------------|---------------------------|------------------------------|---------------|---------------------|---------------|-----------------------|
| <b>Mouse</b>         | MKWKVSVLACILHVRFPGA (E) AQSFGLLDPKLCYLLDGILFIYGVIIITALYLRAK    | FSRSAETAANLQDPNQLYN       | ELNLGRREEYDVLEKKRARDPEMGGKQ  | QRRRNPEQEVYN  | ALQKDKMAEAYSEIGTKGE | RRRGKGDGLYQ   | GLSTATKDTYDALHMQLTAPR |
| <b>Human</b>         | MKWKALFTAAILQAQLPIT (E) AQSFGLLDPKLCYLLDGILFIYGVILTALFLRVK     | FRSADAPAYQGGQNQLYN        | ELNLGRREEYDVLDKRRGRDPEMGGKP  | RRKNPQEGLYN   | ELQKDKMAEAYSEIGMKGE | RRRGKGDGLYQ   | GLSTATKDTYDALHMQLPFR  |
| <b>Rat</b>           | MKWTASVLACILQVQFPGA (G) TEAQSFGLLDPKLCYMLDGILFIYGVIVITALLYLRAK | FRSADAAAYLQDPNQLYN        | ELNLGRREEYDVLDKKRPRDPEMGGKQ  | QRRRNPEQEVYN  | ALQKDKMAEAYSEIGMKGE | RRRGKGDGLYQ   | GLSTATKDTYDALHMQLTAPR |
| <b>Rhesus Monkey</b> | MKWKALFTAAILQAQFPI TEAQSFGLLDPKLCYLLDGILFLYGVILTALFLRVK        | FRSADAPAYQGGQNQLYN        | ELNLGRREEYDVLDKRRGRDPEMGGKP  | QRRKNPQEGLYN  | ALQKDKMAEAYSEIGMKGE | RRRGKGDGLYQ   | GLSTATKDTYDALHMQLPFR  |
| <b>Opossum</b>       | MKWKELVIAAILQALVPIT (E) AQDFGLADPRLCYLLDGILFIYGVIIITALFLRAK    | FSKTARVSAYQRDQNVYN        | ELSMGRREEYDILDKRRGGHDPEIGGKQ | RRKNPQETVYN   | SLQKDKMAEAYSEIGMKGE | RRRGKGDVLYQ   | GLSPATKDTYDALHMQLPFR  |
| <b>Chicken</b>       | MKWKRIAVFVTLQVQLPLT (D) AVTVLGLTDPRLCYLLDGFLFIYAVIIITALFVKAK   | LSQASEPQLLLQDDVYN         | KLRSGRHDEYDVLGTRRGADLEKGGRHE | QRRKNPHDTVYS  | SLQKDKMGEAYSEIGKKGE | QRRRGKGNDAVYQ | GLSAATRDTYDALQMQLPFR  |
| <b>Zebra Fish</b>    | MEMSRTSTLLLLASCVSSA (E) ATVSDPTYCYILDVILLVYSIIFTALYFREK        | FLKEGVPVPPDPAAPVRNPNEPVYT | DLDLPQVGSQYQLDRP             | IRRRPEPTHYQ   | ELRAHASDEYQQIGTKGK  | PRKAKSKSNE    | GRTGRKRDAAEAVEMETFTV  |
