# Supplementary material
Source: PubMed Central journal article supplement (PMC3110614)

A.

ITAM 1 and BRS-2 Sequences in the Murine CD3  $\zeta$  cytoplasmic tail:

RAKF<sup>1</sup>RS<sup>2</sup>SA<sup>3</sup>ETA<sup>4</sup>ANL<sup>5</sup>QDPN<sup>6</sup>QLYN<sup>7</sup>ELNL<sup>8</sup>GR<sup>9</sup>REEY<sup>10</sup>DVLE<sup>11</sup>KK<sup>12</sup>RARD<sup>13</sup>PEM<sup>14</sup>GGK<sup>15</sup>QQR<sup>16</sup>RRN<sup>17</sup>PQEG<sup>18</sup>VY

**Peptides**

ITAM-1 Sub: NQLYNELNLG**AG**EEDVLE

BRS-2 Sub-1: GRREEYDVLE**AVLAG**DPEMGGKQQ**AVGN**

BRS-2 Sub-2: GRREEYDVLEK**VL**ARDPEMGGKQQ**ARGN**

B.

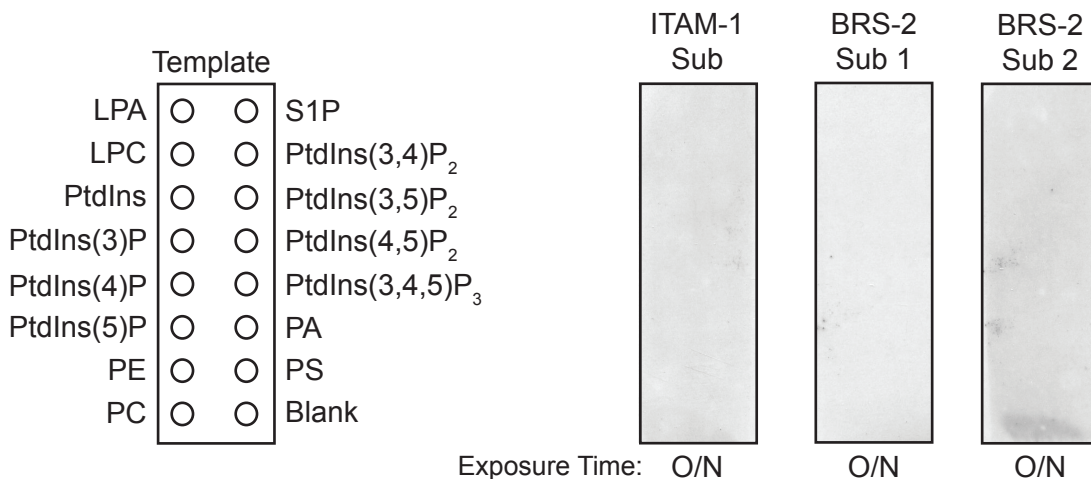

C.

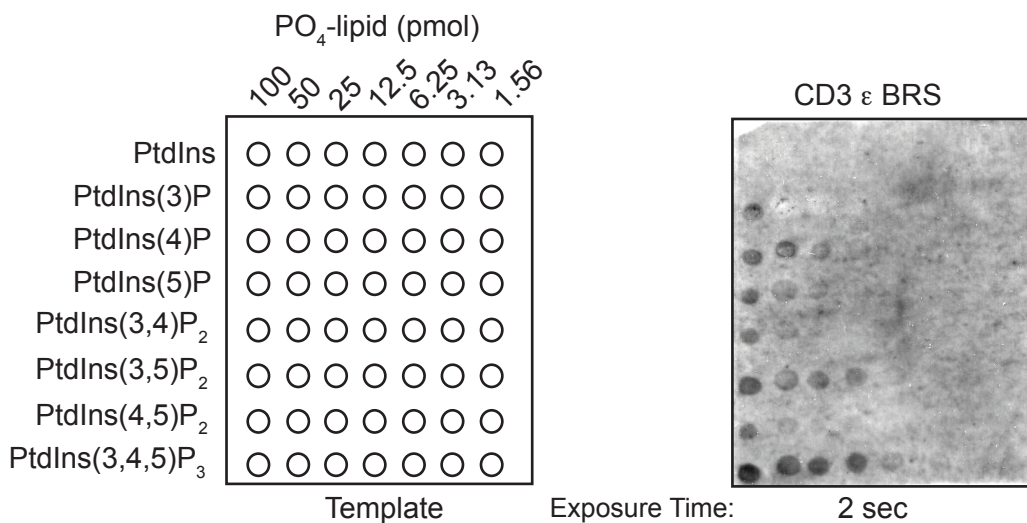

Supplement: NIHMS287959-supplement-3.pdf [file NIHMS287959-supplement-3.pdf]
