# Supplementary material
Source: PubMed Central journal article supplement (PMC3110614)

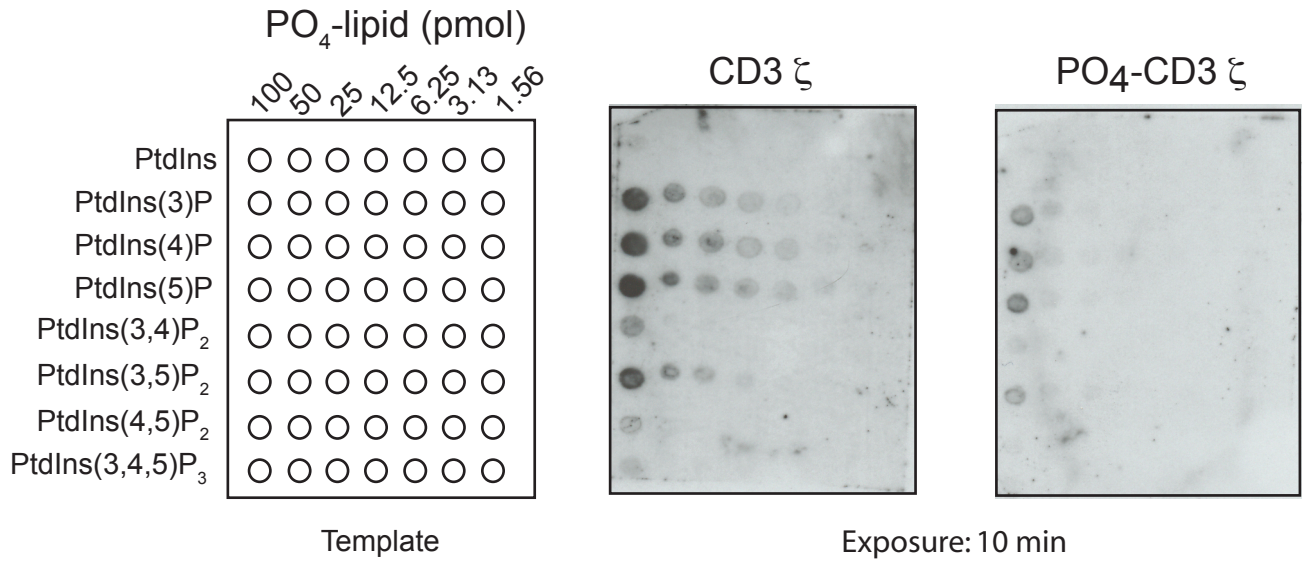

Supplement: NIHMS287959-supplement-4.pdf [file NIHMS287959-supplement-4.pdf]

A.

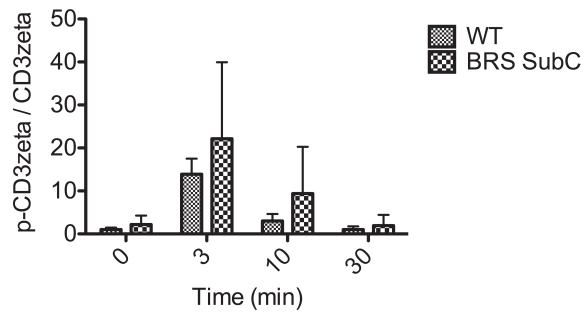

B.

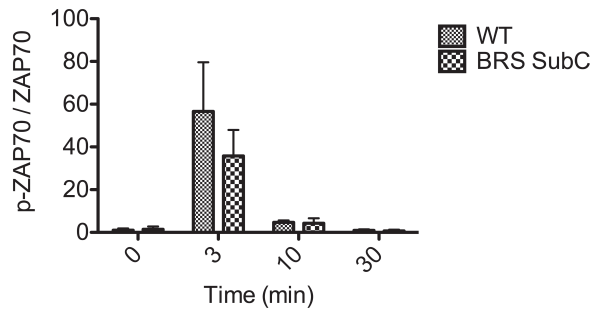

C.

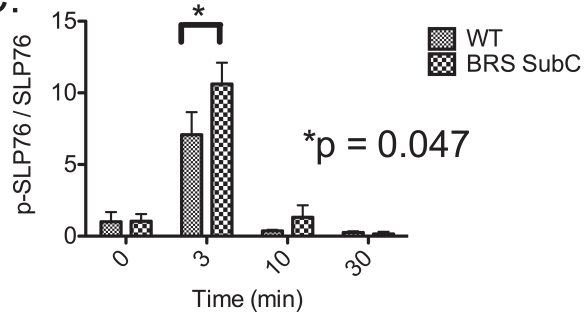

D.

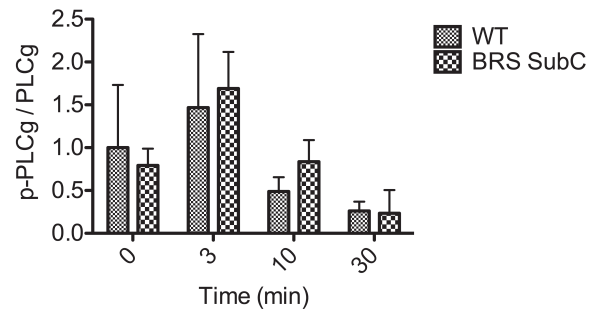

E.

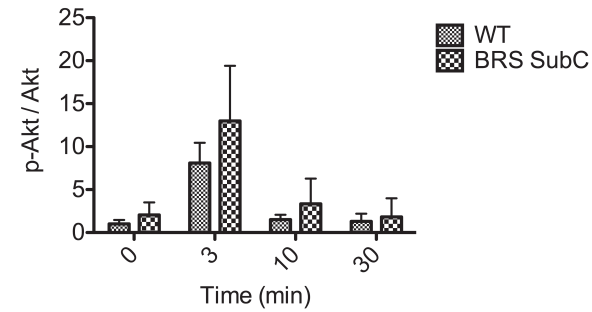

F.

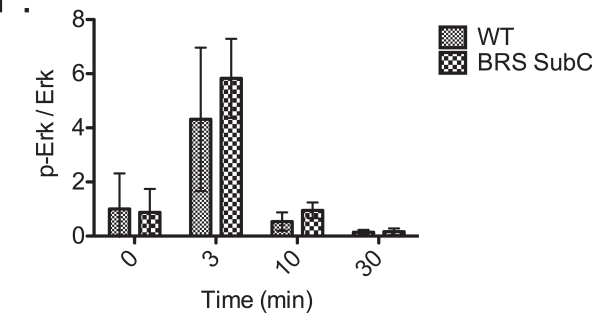

Supplement: NIHMS287959-supplement-5.pdf [file NIHMS287959-supplement-5.pdf]

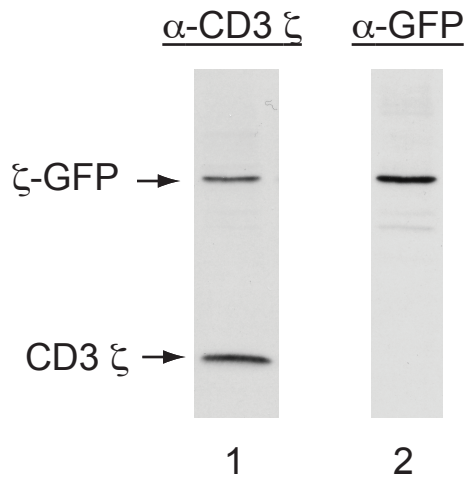

Supplement: NIHMS287959-supplement-6.pdf [file NIHMS287959-supplement-6.pdf]
